# Supplementary material
Source: Elsevier journal article supplement (https://www.sciencedirect.com/science/article/pii/S0300893222004249)
Supplement: mmc1 [file mmc1.pdf]

## **SUPPLEMENTARY DATA**

**Investigator of Korea acute myocardial infarction registry-National Institutes of Health (KAMIR-NIH). Please also consult reference 14 of the main text.**

Myung Ho Jeong (Principal Investigator), Chonnam National University Hospital, Gwangju, Korea.

Young Jo Kim, Yeungnam University Medical Center, Daegu, Korea.

Chong Jin Kim, Kyunghee University Hospital at Gangdong, Seoul, Korea.

Myeong Chan Cho, Chungbuk National University Hospital, Cheongju, Korea.

Hyo-Soo Kim, Seoul National University Hospital, Seoul, Korea.

Hyeon-Cheol Gwon, Samsung Medical Center, Seoul, Korea.

Ki Bae Seung, Seoul St. Mary's Hospital, Seoul, Korea.

Dong Joo Oh, Korea University Guro Hospital, Seoul, Korea.

Shung Chull Chae, Kyungpook National University Hospital, Daegu, Korea.

Kwang Soo Cha, Pusan National University Hospital, Busan, Korea.

Junghan Yoon, Wonju Severance Christian Hospital, Wonju, Korea.

Jei-Keon Chae, Chonbuk National University Hospital, Jeonju, Korea.

Seung Jae Joo, Jeju National University Hospital, Jeju, Korea.

Dong-Ju Choi, Seoul National University Bundang Hospital, Bundang, Korea.

Seung-Ho Hur, Keimyung University Dongsan Medical Center, Daegu, Korea.

In Whan Seong, Chungnam National University Hospital, Daejeon, Korea.

Doo Il Kim, Inje University Haeundae Paik Hospital, Busan, Korea.

Seok Kyu Oh, Wonkwang University Hospital, Iksan, Korea.

Tae Hoon Ahn, Gachon University Gil Medical Center, Incheon, Korea.

Jin-Yong Hwang, Gyeongsang National University Hospital, Jinju, Korea.

**Table 1 of the supplementary data.** Baseline clinical characteristics of AMI patients with a high ischemic risk after PSM

|                                   | IVUS-guided<br>(n = 806) | Angiography-guided<br>(n = 806) | P-value | SMD (%) |
|-----------------------------------|--------------------------|---------------------------------|---------|---------|
| <b>Demographic</b>                |                          |                                 |         |         |
| Age, years                        | 65.5 ± 11.7              | 65.1 ± 11.9                     | 0.490   | 3.44    |
| Male sex                          | 595 (73.8%)              | 598 (74.2%)                     | 0.910   | 0.85    |
| Body mass index                   | 24.3 ± 3.6               | 24.2 ± 3.2                      | 0.736   | 1.68    |
| Killip class III                  | 72 (8.9%)                | 66 (8.2%)                       | 0.656   | 2.66    |
| <b>Clinical presentation</b>      |                          |                                 |         |         |
| STEMI                             | 314 (39.0%)              | 320 (39.7%)                     |         |         |
| NSTEMI                            | 492 (61.0%)              | 486 (60.3%)                     |         |         |
| <b>Cardiovascular risk factor</b> |                          |                                 |         |         |
| Hypertension                      | 479 (59.4%)              | 480 (59.6%)                     | 1.000   | 0.25    |
| Diabetes mellitus                 | 458 (56.8%)              | 457 (56.7%)                     | 1.000   | 0.25    |
| Dyslipidemia                      | 128 (15.9%)              | 121 (15.0%)                     | 0.679   | 2.4     |
| Current smoker                    | 277 (34.4%)              | 296 (36.7%)                     | 0.349   | 4.92    |
| History of MI                     | 66 (8.2%)                | 56 (6.9%)                       | 0.397   | 4.69    |
| History of PCI                    | 45 (5.6%)                | 37 (4.6%)                       | 0.428   | 4.52    |
| History of CVA                    | 58 (7.2%)                | 59 (7.3%)                       | 1.000   | 0.48    |
| Familial history                  | 54 (6.7%)                | 60 (7.4%)                       | 0.627   | 2.9     |
| EF ≤50%                           | 296 (36.7%)              | 301 (37.3%)                     | 0.837   | 1.28    |
| eGFR, mL/min/1.73 m <sup>2</sup>  | 80.0 ± 50.3              | 79.7 ± 42.0                     | 0.895   | 0.66    |
| CKD (eGFR ≤60)                    | 314 (39.0%)              | 337 (41.8%)                     | 0.264   | 5.81    |
| <b>Medication at discharge</b>    |                          |                                 |         |         |
| DAPT                              |                          |                                 |         |         |
| Aspirin                           | 806 (100.0%)             | 806 (100.0%)                    | 1.000   | 0       |
| P2Y <sub>12</sub> inhibitor       | 804 (99.8%)              | 801 (99.4%)                     | 0.449   | 5.66    |
| Clopidogrel                       | 647 (80.3%)              | 625 (77.5%)                     |         |         |
| Prasugrel                         | 58 (7.2%)                | 94 (11.7%)                      |         |         |
| Ticagrelor                        | 208 (25.8%)              | 182 (22.6%)                     |         |         |
| RAAS inhibitor                    | 645 (80.0%)              | 651 (80.8%)                     | 0.754   | 1.87    |
| Beta-blocker                      | 666 (82.6%)              | 670 (83.1%)                     | 0.843   | 1.32    |
| Statin                            | 758 (94.0%)              | 756 (93.8%)                     | 0.917   | 1.04    |

Values are presented as mean ± SD or n (%). CKD, chronic kidney disease; CVA, cerebrovascular accident; DAPT, dual antiplatelet therapy; eGFR, estimated glomerular filtration rate; IVUS, intravascular ultrasound; LVEF, left ventricular ejection fraction; MI, myocardial infarction; NSTEMI, non-ST-elevation myocardial infarction; PCI, percutaneous coronary intervention; PSM, propensity score matching; RAAS, renin-angiotensin-aldosterone system; STEMI, ST-elevation myocardial infarction.

**Table 2 of the supplementary data.** Lesion and procedural characteristics of AMI patients with a high ischemic risk after PSM

|                                        | IVUS-guided<br>(n = 806) | Angiography-guided<br>(n = 806) | P-value | SMD (%) |
|----------------------------------------|--------------------------|---------------------------------|---------|---------|
| <b>Lesion characteristic</b>           |                          |                                 |         |         |
| <i>Type of vessel disease</i>          |                          |                                 | .273    | 3.32    |
| One-vessel disease                     | 234 (29.0)               | 259 (32.1)                      |         |         |
| Two-vessel disease                     | 369 (45.8)               | 339 (42.1)                      |         |         |
| Three-vessel disease                   | 203 (25.2)               | 208 (25.8)                      |         |         |
| <i>Culprit vessel</i>                  |                          |                                 | .072    | 1.99    |
| LM                                     | 102 (12.7)               | 72 (8.9)                        |         |         |
| LAD                                    | 382 (47.4)               | 419 (52.0)                      |         |         |
| LCX                                    | 104 (12.9)               | 104 (12.9)                      |         |         |
| RCA                                    | 218 (27.0)               | 211 (26.2)                      |         |         |
| <i>ACC/AHA B2/C lesion</i>             | 695 (86.2)               | 677 (84.0)                      | .234    | 6.27    |
| <i>3 vessels treated</i>               | 45 (5.6)                 | 57 (7.1)                        | .26     | 6.11    |
| <i>≥ 3 lesions treated</i>             | 55 (6.8)                 | 64 (7.9)                        | .446    | 4.27    |
| <b>Procedural characteristic</b>       |                          |                                 |         |         |
| <i>Trans-radial approach</i>           | 310 (38.5)               | 308 (38.2)                      | .959    | 0.51    |
| <i>Glycoprotein IIb/IIIa inhibitor</i> | 134 (16.6)               | 139 (17.2)                      | .791    | 1.65    |
| <i>Thrombus aspiration</i>             | 148 (18.4)               | 156 (19.4)                      | .656    | 2.54    |
| <i>Stent type</i>                      |                          |                                 | .472    | 1.98    |
| Biolimus                               | 76 (9.4)                 | 91 (11.3)                       |         |         |
| Everolimus                             | 450 (55.8)               | 430 (53.3)                      |         |         |
| Zotarolimus                            | 205 (25.4)               | 197 (24.4)                      |         |         |
| Sirolimus                              | 35 (4.3)                 | 36 (4.5)                        |         |         |
| Novolimus                              | 40 (5.0)                 | 52 (6.5)                        |         |         |
| <i>Stent diameter</i>                  | 3.2 ± 0.5                | 3.2 ± 0.4                       | .695    | 1.95    |
| <i>Total stent length</i>              | 36.5 ± 19.6              | 35.4 ± 19.0                     | .279    | 5.39    |
| <i>&gt; 60 mm</i>                      | 124 (15.4)               | 105 (13.0)                      | .199    | 6.75    |
| <i>Total number of stents</i>          | 2.0 ± 1.1                | 2.0 ± 1.1                       | .831    | 1.06    |
| <i>≥ 3 stents</i>                      | 232 (28.8)               | 232 (28.8)                      | 1.000   | 0       |

Values are presented as mean ± SD or n (%). ACC, American College of Cardiology; AHA, American Heart Association; DES, drug-eluting stent; IVUS, intravascular ultrasound; LAD, left anterior descending artery; LCX, left circumflex artery; LM, left main; PSM, propensity score matching; RCA, right coronary artery.

**Table 3 of the supplementary data.** Baseline clinical characteristics of AMI Patients without a high ischemic risk

|                                           | Crude population         |                                   |         |
|-------------------------------------------|--------------------------|-----------------------------------|---------|
|                                           | IVUS-guided<br>(N = 982) | Angiography-guided<br>(N = 3,838) | P-value |
| <b>Demographic</b>                        |                          |                                   |         |
| <i>Age, years</i>                         | 59.9 ± 12.0              | 60.9 ± 12.4                       | .015    |
| <i>Male sex</i>                           | 818 (83.3)               | 3057 (79.7)                       | .012    |
| <i>Body mass index (kg/m<sup>2</sup>)</i> | 24.1 ± 3.2               | 24.2 ± 3.2                        | .404    |
| <i>Killip class 3</i>                     | 35 (3.6)                 | 151 (3.9)                         | .657    |
| <b>Clinical presentation</b>              |                          |                                   |         |
| <i>STEMI</i>                              | 498 (50.7)               | 2150 (56.0)                       | .003    |
| <i>NSTEMI</i>                             | 484 (49.3)               | 1688 (44.0)                       |         |
| <b>Cardiovascular risk factor</b>         |                          |                                   |         |
| <i>Hypertension</i>                       | 344 (35.0)               | 1531 (39.9)                       | .006    |
| <i>Dyslipidemia</i>                       | 86 (8.8)                 | 415 (10.8)                        | .068    |
| <i>Current smoker</i>                     | 483 (49.2)               | 1786 (46.5)                       | .147    |
| <i>History of MI</i>                      | 38 (3.9)                 | 142 (3.7)                         | .876    |
| <i>History of PCI</i>                     | 24 (2.4)                 | 105 (2.7)                         | .693    |
| <i>History of CVA</i>                     | 26 (2.6)                 | 150 (3.9)                         | .074    |
| <i>Familial history</i>                   | 73 (7.4)                 | 308 (8.0)                         | .585    |
| <i>EF ≤ 50%</i>                           | 299 (30.4)               | 1291 (33.6)                       | .063    |
| <i>eGFR, mL/min/1.73 m<sup>2</sup></i>    | 98.7 ± 30.5              | 102.2 ± 42.4                      | .003    |
| <b>Medication at discharge</b>            |                          |                                   |         |
| <i>DAPT</i>                               |                          |                                   |         |
| Aspirin                                   | 981 (99.9)               | 3836 (99.9)                       | 1.000   |
| P2Y <sub>12</sub> inhibitor               | 975 (99.3)               | 3829 (99.8)                       | .044    |
| Clopidogrel                               | 690 (70.3)               | 2844 (74.1)                       | .017    |
| Prasugrel                                 | 99 (10.1)                | 629 (16.4)                        | < .001  |
| Ticagrelor                                | 336 (34.2)               | 971 (25.3)                        | < .001  |
| <i>RAS inhibitor</i>                      | 790 (80.4)               | 3216 (83.8)                       | .014    |
| <i>Beta-blocker</i>                       | 817 (83.2)               | 3362 (87.6)                       | < .001  |
| <i>Statin</i>                             | 963 (98.1)               | 3679 (95.9)                       | .001    |

Values are presented as mean ± SD or n (%). CVA, cerebrovascular accident; DAPT, dual antiplatelet therapy; eGFR, estimated glomerular filtration rate; IVUS, intravascular ultrasound; LVEF, left ventricular ejection fraction; MI, myocardial infarction; NSTEMI, non-ST-elevation myocardial infarction; PCI, percutaneous coronary intervention; PS, propensity score; RAS, renin-angiotensin system; SMD, standard mean difference; STEMI, ST-elevation myocardial infarction.

**Table 4 of the supplementary data.** Lesion and procedural characteristics of AMI patients without a high ischemic risk

|                                        | Crude population         |                                   |         |
|----------------------------------------|--------------------------|-----------------------------------|---------|
|                                        | IVUS-guided<br>(N = 982) | Angiography-guided<br>(N = 3,838) | P-value |
| <b>Lesion characteristic</b>           |                          |                                   |         |
| <i>Type of vessel disease</i>          |                          |                                   | .129    |
| 1-vessel disease                       | 574 (58.5)               | 2370 (61.8)                       |         |
| 2-vessel disease                       | 302 (30.8)               | 1061 (27.6)                       |         |
| Th3ree-vessel disease                  | 106 (10.8)               | 407 (10.6)                        |         |
| <i>Culprit vessel</i>                  |                          |                                   | < .001  |
| LAD                                    | 565 (57.5)               | 1962 (51.1)                       |         |
| LCX                                    | 170 (17.3)               | 689 (18.0)                        |         |
| RCA                                    | 247 (25.2)               | 1187 (30.9)                       |         |
| ACC/AHA B2/C lesion                    | 838 (85.3)               | 3340 (87.0)                       | .181    |
| <b>Procedural characteristic</b>       |                          |                                   |         |
| <i>Trans-radial approach</i>           | 475 (48.4)               | 1538 (40.1)                       | < .001  |
| <i>Glycoprotein IIb/IIIa inhibitor</i> | 207 (21.1)               | 586 (15.3)                        | < .001  |
| <i>Thrombus aspiration</i>             | 256 (26.1)               | 1066 (27.8)                       | .303    |
| <i>Stent type</i>                      |                          |                                   | < .001  |
| Biolimus                               | 132 (13.4)               | 684 (17.8)                        |         |
| Everolimus                             | 523 (53.3)               | 1875 (48.9)                       |         |
| Zotarolimus                            | 230 (23.4)               | 895 (23.3)                        |         |
| Sirolimus                              | 47 (4.8)                 | 116 (3.0)                         |         |
| Novolimus                              | 50 (5.1)                 | 268 (7.0)                         |         |
| <i>Stent diameter</i>                  | 3.2 ± 0.5                | 3.1 ± 0.4                         | < .001  |
| <i>Total stent length</i>              | 27.4 ± 10.3              | 26.5 ± 9.5                        | .009    |
| <i>Total stent number</i>              | 1.2 ± 0.4                | 1.2 ± 0.4                         | .039    |

Values are presented as mean ± SD or n (%). ACC, American College of Cardiology; AHA, American Heart Association; DES, drug-eluting stent; IVUS, intravascular ultrasound; LAD, left anterior descending artery; LCX, left circumflex artery; LM, left main; RCA, right coronary artery.

**Table 5 of the supplementary data.** Comparison of 3-Year outcomes in AMI patients without a high ischemic risk

|                                          | IVUS-guided PCI<br>(n = 982) | Angiography-guided PCI<br>(n = 3838) | Unadjusted       |         | Multivariable-adjusted <sup>b</sup> |         | IPW-adjusted     |         |
|------------------------------------------|------------------------------|--------------------------------------|------------------|---------|-------------------------------------|---------|------------------|---------|
|                                          |                              |                                      | HR (95%CI)       | P-value | HR (95%CI)                          | P-value | HR (95%CI)       | P-value |
| <i>Target lesion failure<sup>a</sup></i> | 30 (3.1)                     | 165 (4.3)                            | 0.71 (0.48–1.05) | .084    | 0.78 (0.52–1.15)                    | .203    | 0.73 (0.48–1.12) | .151    |
| Cardiac death                            | 15 (1.5)                     | 107 (2.8)                            | 0.55 (0.32–0.94) | .029    | 0.66 (0.38–1.13)                    | .131    | 0.68 (0.36–1.27) | .222    |
| TV-MI                                    | 5 (0.5)                      | 27 (0.7)                             | 0.72 (0.28–1.88) | .505    | 0.73 (0.28–1.91)                    | .522    | 0.57 (0.21–1.52) | .260    |
| ID-TLR                                   | 13 (1.3)                     | 49 (1.3)                             | 1.04 (0.56–1.91) | .909    | 1.04 (0.56–1.93)                    | .894    | 0.96 (0.52–1.80) | .907    |
| <i>MACE<sup>c</sup></i>                  | 93 (9.5)                     | 443 (11.5)                           | 0.82 (0.65–1.02) | .075    | 0.86 (0.69–1.08)                    | .195    | 0.85 (0.67–1.08) | .193    |
| All-cause death                          | 27 (2.7)                     | 176 (4.6)                            | 0.59 (0.40–0.89) | .012    | 0.67 (0.45–1.01)                    | .057    | 0.65 (0.42–1.03) | .067    |
| Any MI                                   | 20 (2.0)                     | 70 (1.8)                             | 1.11 (0.68–1.83) | .676    | 1.14 (0.69–1.88)                    | .603    | 1.06 (0.64–1.78) | .818    |
| Any revascularization                    | 64 (6.5)                     | 256 (6.7)                            | 0.98 (0.74–1.28) | .865    | 1.00 (0.76–1.32)                    | .998    | 1.01 (0.75–1.36) | .925    |
| <i>Definite/probable ST</i>              | 3 (0.3)                      | 25 (0.7)                             | 0.47 (0.14–1.55) | .212    | 0.50 (0.15–1.67)                    | .260    | 0.56 (0.14–2.26) | .412    |

Values are presented as n (%) unless otherwise indicated. CI, confidence interval; CKD, chronic kidney disease; HR, hazard ratio; ID-TLR, ischemic-driven target lesion revascularization; IVUS, intravascular ultrasound; IPW, inverse probability weighting; LM, left main; LVEF, left ventricular ejection fraction; MACE, major adverse cardiovascular event; MI, myocardial infarction; PCI, percutaneous coronary intervention; ST, stent thrombosis; TLR, target lesion revascularization; TV-MI, target vessel myocardial infarction.

<sup>a</sup>Target lesion failure: a composite of cardiac death, target vessel MI, and ID-TLR.

<sup>b</sup>Adjusted variables: age, sex, Killip class 3, hypertension, diabetes, history of PCI, CVA, LVEF ≤50%, CKD, multivessel disease, LM PCI, procedural factors (trans-radial approach, stent length ≥ 35 mm, number of stents ≥ 2).

<sup>c</sup>MACE: a composite of all-cause death, MI, and any revascularization.

Figure 1 of the supplementary data. Covariate balance between IVUS-guided and angiography-guided PCI in high ischemic risk

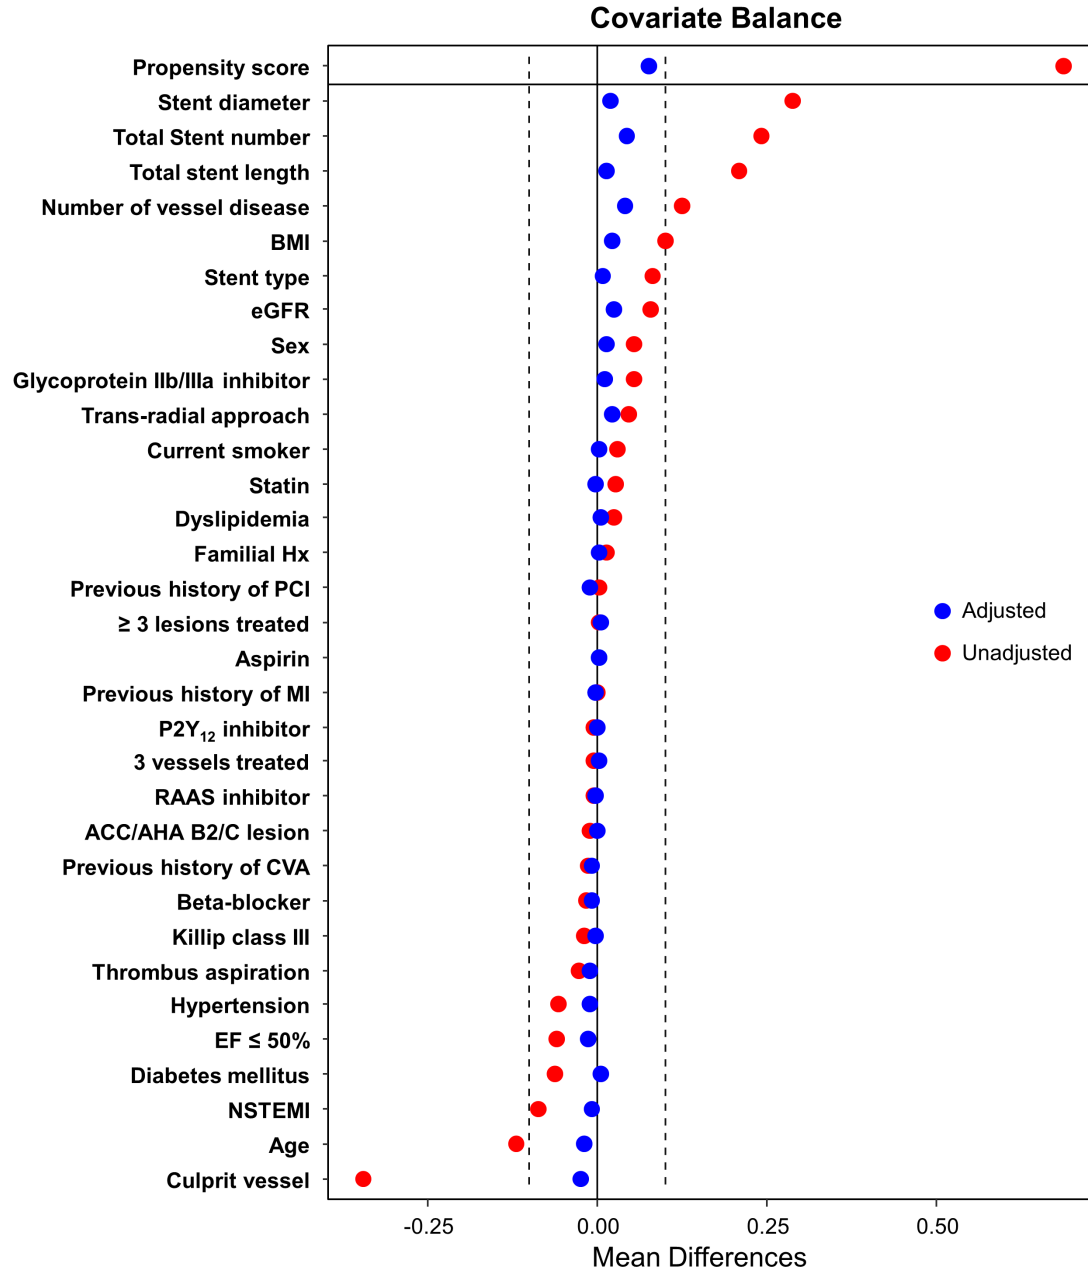

ACC/AHA, American College of Cardiology/American Heart Association; BMI, body mass index; CVA, cerebrovascular accident; EF, ejection fraction; eGFR, estimated glomerular filtration rate; IPW, inverse probability weighting; IVUS, intravascular ultrasound; MI, myocardial infarction; NSTEMI, non-ST-elevation myocardial infarction; PCI, percutaneous coronary intervention; RAAS, renin-angiotensin-aldosterone system.

Figure 2 of the supplementary data. Covariate balance between IVUS-Guided and angiography-guided PCI in non-high ischemic risk

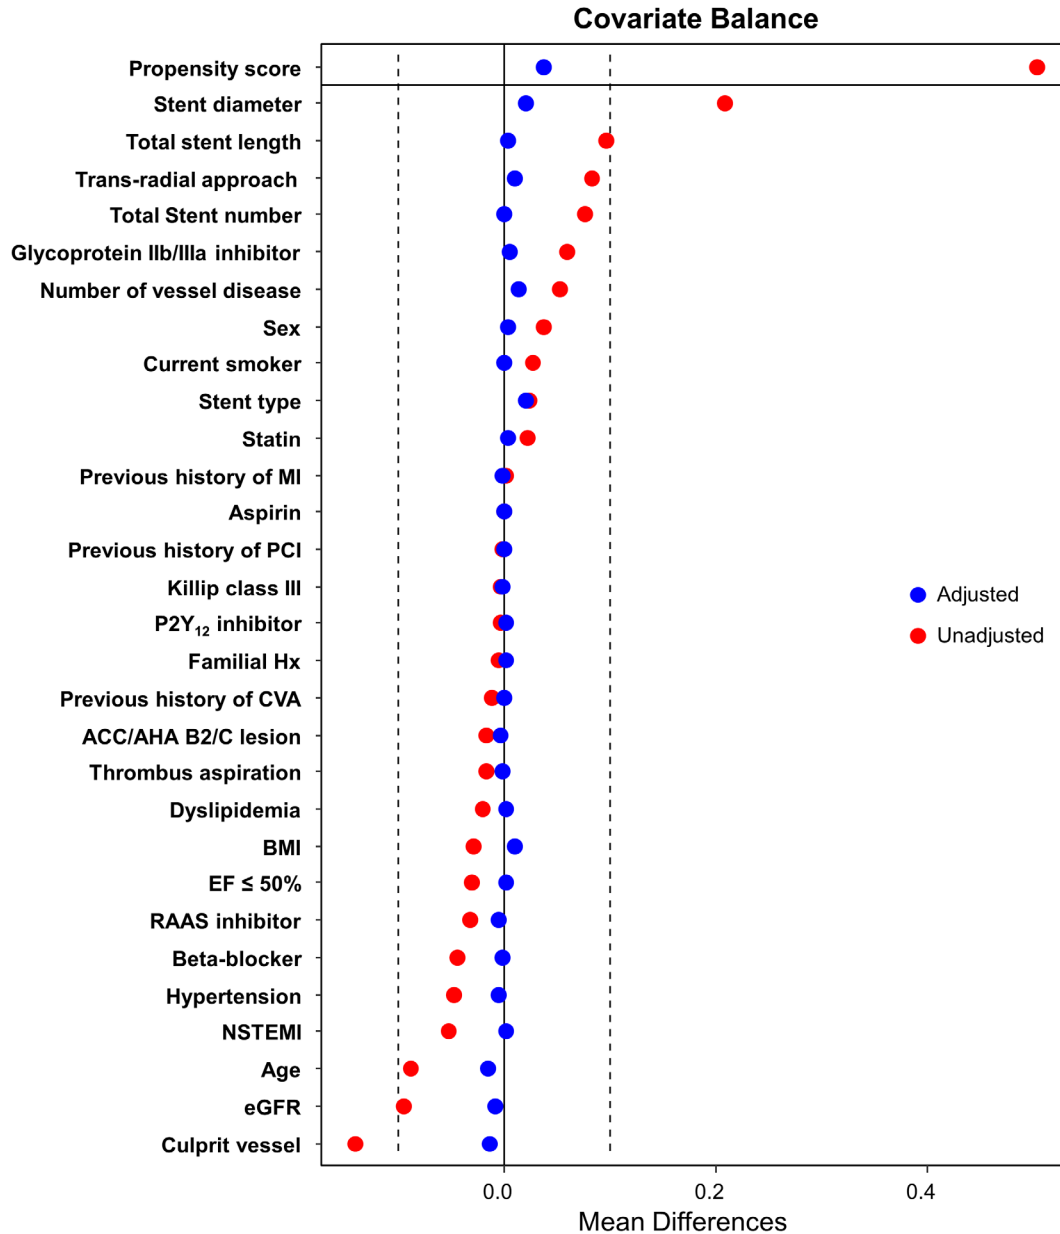

ACC/AHA, American College of Cardiology/American Heart Association; CVA, cerebrovascular accident; EF, ejection fraction; eGFR, estimated glomerular filtration rate; IPW, inverse probability weighting; IVUS, intravascular ultrasound; MI, myocardial infarction; NSTEMI, non-ST-elevation myocardial infarction; PCI, percutaneous coronary intervention; RAAS, renin-angiotensin-aldosterone system.



Figure 3 of the supplementary data. Components of high ischemic risk

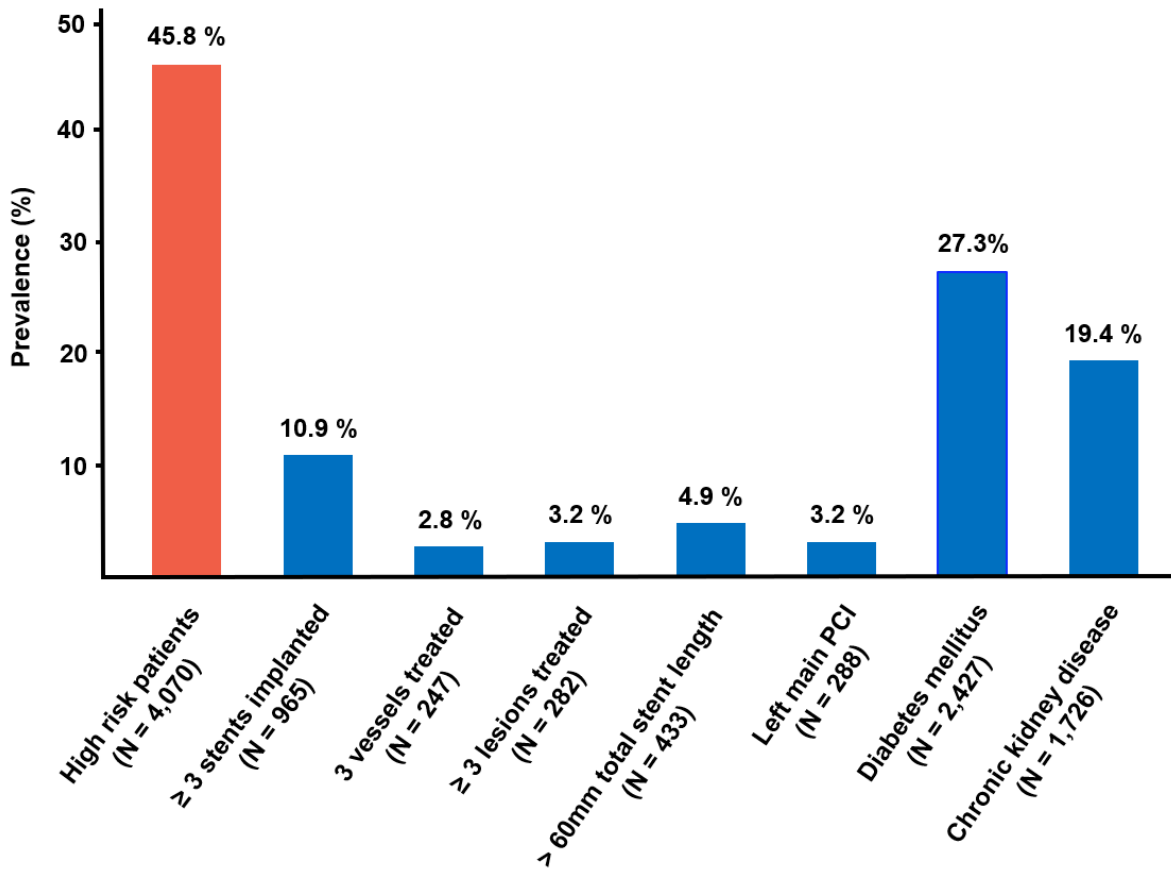

PCI, percutaneous coronary intervention.
